# Supplementary material for: Continuously processing waste lignin into high-value carbon nanotube fibers
Source: Research Square preprint supplement (doi:10.21203/rs.3.rs-1334488/v1), 2022-03-30
Supplement: Supplementary file 1 [file fa091015271ee80b7c5e661e.docx]

**Supporting Information**

**Continuously processing waste lignin into high-value carbon nanotube fibers**

*Fuyao Liu, Qianqian Wang, Gongxun Zhai, Hengxue Xiang*, Jialiang Zhou, Chao Jia*, Liping Zhu, Qilin Wu, Meifang Zhu**

State Key Laboratory for Modification of Chemical Fibers and Polymer Materials, College of Materials Science and Engineering, Donghua University, Shanghai 201620, China

Corresponding Author

* Correspondence to: hengxuexiang@dhu.edu.cn; jiachao0806@dhu.edu.cn; zmf@dhu.edu.cn

**This file includes:**

Table S1 to S8

Figs. S1 to S20

Legend for Movie S1

References (1 to 22)

**Other Supplementary Materials for this manuscript include the following:**

Movies S1 Continuously processing waste lignin into high-value carbon nanotube fibers

**Table S1.** Comparison of the structures and morphologies of our prepared CNTs with those of other reported CNTs.

| Biomass | Continuous preparation | Macroscopic morphology | Synthesis temperature  (°C) | IG/ID | Layer number | Micro morphology | Reference |
| --- | --- | --- | --- | --- | --- | --- | --- |
| **Lignin** | **Yes**  **(120 m h-1)** | **CNT fiber** | **1400** | **3.84** | **MWNTs** | **CNT aerogels** | **This work** |
| Eucalyptus oil | No | powder | 850 | 3.3 | SWNTs/ MWNTs | carbon/CNT mixture | 1 |
| Turpentine oil | No | powder | 700 | 0.93 | MWNTs | CNT arrays | 2 |
| Sesame oil | No | powder | 900 | 0.98 | MWNTs | CNT arrays | 3 |
| Grass | No | powder | 600 | 2.0 | MWNTs | CNT arrays | 4 |
| Plant | No | powder | ＞600 | - | MWNTs | carbon/CNT mixture | 5 |
| Poplar leaves | No | powder | 450 | 0.79 | MWNTs | carbon/CNT mixture | 6 |
| Lignin | No | powder | 2000 | 1.0 | MWNTs | carbon/CNT mixture | 7 |

**Notes:** Single wall carbon nanotubes(SWNTs), Multiwalled carbon nanotubes(MWNTs)

**Table S2.** Assignments of 13C-1H cross signals in the HSQC spectra of lignin.

| Label | *δ*C*/δ*H(ppm) | Assignments |
| --- | --- | --- |
| Bβ | 53.5/3.07 | Cβ-Hβ in β-β resinol (B) |
| OCH3 | 56.4/3.70 | C-H in methoxyls |
| Aγ | 59.9/3.35-3.80 | Cγ-Hγ in β-O-4 substructures (A) |
| Bγ | 71.2/3.82-4.18 | Cγ-Hγ in β-β resinol (B) |
| Aα | 71.8/4.86 | Cα-Hα in β-O-4 unit (A) |
| Aβ(G) | 83.4/4.38 | Cβ-Hβ in β-O-4 linked to G (A) |
| Bα | 84.8/4.66 | Cα-Hα in β-β resinol (B) |
| S2,6 | 103.9/6.70 | C2,6-H2,6 in syringyl units (S) |
| S'2,6 | 106.3/7.32 | C2,6-H2,6 in oxidized S units (S') |
| G2 | 110.8/6.97 | C2-H5 in guaiacyl units (G) |
| G5 | 114.5/6.70 | C5-H5 in guaiacyl units (G) |
| G6 | 119.0/6.78 | C6-H6 in guaiacyl units (G) |

**Table S3.** Simulated analysis result of lignin molecule from ChemDraw.

| Item | Result |
| --- | --- |
| Chemical formula | C205H234O81 |
| Exact mass | 3991.4 |
| Molecular weight | 3994.0 |
| Elemental analysis | C:61.65, H:5.91, O:32.45 |

**Table S4.** Main pyrolysis products of lignin at 800℃ from PY-GCMS.

| Number | Time (s) | Area (%) | Formula | CAS Number | Remark |
| --- | --- | --- | --- | --- | --- |
| 1 | 1.70 | 23.90 |  |  | Multi-component peak |
| 2 | 1.78 | 2.49 | C5H8O | 10229-10-4 |  |
| 3 | 1.92 | 31.92 |  |  | Multi-component peak |
| 4 | 1.96 | 0.17 | C4H6 | 590-19-2 | Other |
| 5 | 2.00 | 0.55 | C5H8 | 78-79-5 | Other |
| 6 | 2.13 | 1.93 | C5H6 | 542-92-7 |  |
| 7 | 2.36 | 0.20 | C5H6 | 542-92-7 | Other |
| 8 | 2.63 | 0.07 | C6H10 | 513-81-5 | Other |
| 9 | 2.85 | 0.84 | C6H8 | 592-57-4 | Other |
| 10 | 2.89 | 0.65 | C6H8 | 96-39-9 | Other |
| 11 | 3.12 | 6.05 | C6H6 | 71-43-2 |  |
| 12 | 3.21 | 1.03 | C4H4S | 110-02-1 |  |
| 13 | 4.76 | 5.74 | C7H8 | 108-88-3 |  |
| 14 | 4.84 | 0.56 | C5H6S | 616-44-4 | Other |
| 15 | 4.98 | 0.35 | C5H6S | 554-14-3 | Other |
| 16 | 6.40 | 0.50 | C8H10 | 100-41-4 | Other |
| 17 | 6.54 | 1.53 | C8H10 | 108-38-3 |  |
| 18 | 6.70 | 0.16 | C6H8S | 632-15-5 | Other |
| 19 | 6.92 | 2.07 | C8H8 | 100-42-5 |  |
| 20 | 8.01 | 0.25 | C9H12 | 620-14-4 | Other |
| 21 | 8.31 | 0.28 | C9H10 | 98-83-9 | Other |
| 22 | 8.50 | 0.91 | C9H10 | 611-15-4 | Other |
| 23 | 8.56 | 0.36 | C8H6O | 271-89-6 | Other |
| 24 | 8.66 | 0.81 | C6H6O | 108-95-2 | Other |
| 25 | 9.22 | 1.84 | C9H8 | 95-13-6 |  |
| 26 | 9.48 | 2.27 | C7H8O | 95-48-7 |  |
| 27 | 9.84 | 0.88 | C7H8O | 108-39-4 | Other |
| 28 | 9.91 | 0.96 | C9H8O | 17059-52-8 | Other |
| 29 | 9.99 | 0.66 | C8H8N2 | 614-97-1 | Other |
| 30 | 10.07 | 0.89 | C8H10O | 576-26-1 | Other |
| 31 | 10.54 | 0.89 | C10H10 | 2177-47-1 | Other |
| 32 | 10.63 | 2.22 | C10H10 | 767-59-9 |  |
| 33 | 11.01 | 1.84 | C10H8 | 91-20-3 |  |
| 34 | 11.13 | 0.15 | C8H6S | 270-82-6 | Other |
| 35 | 11.14 | 0.18 | C9H10N2 | 582-60-5 | Other |
| 36 | 11.21 | 0.31 | C9H12O | 2416-94-6 | Other |
| 37 | 12.25 | 1.09 | C11H10 | 91-57-6 |  |
| 38 | 12.43 | 0.70 | C11H10 | 90-12-0 | Other |
| 39 | 13.09 | 0.16 | C12H10 | 92-52-4 | Other |
| 40 | 13.37 | 0.18 | C12H12 | 575-37-1 | Other |
| 41 | 13.51 | 0.18 | C12H12 | 571-58-4 | Other |
| 42 | 13.62 | 0.18 | C12H10 | 827-54-3 | Other |
| 43 | 13.86 | 0.44 | C12H8 | 259-79-0 | Other |
| 44 | 14.09 | 0.13 | C13H12 | 644-08-6 | Other |
| 45 | 15.50 | 0.31 | C11H10O | 7469-77-4 | Other |

**Table S5.** Composition and proportion of small molecule products from lignin pyrolysis at 800℃ (Split the peaks with retention times 1.697 and 1.92 from Table S4 and Figure S8).

| Number | | Time (s) | | Area (%) | Formula | CAS Number | Remark |
| --- | --- | --- | --- | --- | --- | --- | --- |
| 1 | | 1.70 | | 23.90 | / | / | Multi-component peak |
| 3 | | 1.92 | | 31.92 | / | / | Multi-component peak |
| Total | |  | | 55.82 |  |  |  |
| M/Z | Area (%) | | Area (%) | | Formula | CAS Number | Remark |
| 28 | 31.26 | | 17.45 | | CO | 630-08-0 |  |
| 44 | 13.00 | | 7.26 | | CO2 | 124-38-9 |  |
| 18 | 48.54 | | 27.09 | | H2O | 7732-18-5 |  |
| 16 | 7.19 | | 4.02 | | CH4 | 74-82-8 |  |
| Total | 100 | | 55.82 | |  |  |  |

**Table S6.** Comparison of thermal conductivity of our CNT fibers and other biomass-derived carbon materials as well as common metals.

| Materials | Thermal conductivity  (W m-1 K-1) | Density (g cm-³) | | Reference |
| --- | --- | --- | --- | --- |
| **Lignin-CNT Film** | **42** | | **0.71** | **This work** |
| PMMA/CNT | 3.44 | | 1.18 | 8 |
| Polycarbonate/CNT | 1.27 | | 1.2 | 9 |
| Lignin-based carbon foams | 0.75 | | 0.68 | 10 |
| Lignin-based carbon fibers | 24 | | 2.189 | 11 |
| Lignin-based carbon fibers | 1.8 | | 2 | 12 |
| Lignin aerogels | 0.06 | | 2.5 | 13 |
| Silver (Ag) | 419 | | 10.49 | 14 |
| Copper (Cu) | 385 | | 7.76 | 14 |
| Aluminum (Al) | 210 | | 2.7 | 14 |
| Iron (Fe) | 76.2 | | 7.87 | 14 |

**Table S7.** Comparison of tensile strength and conductivity of our CNT fibers and other biomass-derived carbon materials.

| Materials | Conductivity  (S m-1) | | Tensile strength  (MPa) | | Reference |
| --- | --- | --- | --- | --- | --- |
| **Lignin-CNT fiber** | | **6.28×105** | | **1351** | **This work** |
| Lignin/Nanocellulose Hydrogels  (wet-spun) | | 1.03×104 | | 88 | 15 |
| Softwood kraft lignin (melt-spun) | | 1.91×104 | | 369 | 16 |
| Lignin-based carbon fibers (wet-spinning) | | 1.41×104 | | 351 | 17 |
| Eucalyptus tar pitch | | 5×103 | | 129 | 18 |
| Lignin/Nanocellulose (Flow-Assisted) | | 1.85×104 | | 1648 | 19 |
| Nanocellulose/silver | | 2.3×105 | | 80.3 | 20 |
| Lignin/ PVA /GO | | 2×103 | | 763 | 21 |
| Silk/SWNT | | 1×103 | | 590 | 22 |
| Silk/Graphene | | 3×103 | | 570 | 22 |
| Silver (Ag) | | 6.3×107 | | 140 | 14 |
| Copper (Cu) | | 5.8×107 | | 210 | 14 |
| Aluminum (Al) | | 3.5×107 | | 100 | 14 |
| Iron (Fe) | | 1.0×107 | | 540 | 14 |

**Table S8.** Composition analysis of lignin.

| Analysis method | Component | Content (%) | |
| --- | --- | --- | --- |
| Proximate analysis | Moisture | | 2.3 |
|  | Ash | | 1.1 |
|  | Volatiles | | 59 |
|  | Fixed carbon | | 37.7 |
| Ultimate analysis | Carbon | | 61.92 |
|  | Hydrogen | | 5.68 |
|  | Oxygen | | 31.92 |
|  | Nitrogen | | ≤0.05 |
|  | Sodium | | ≤0.005 |

**
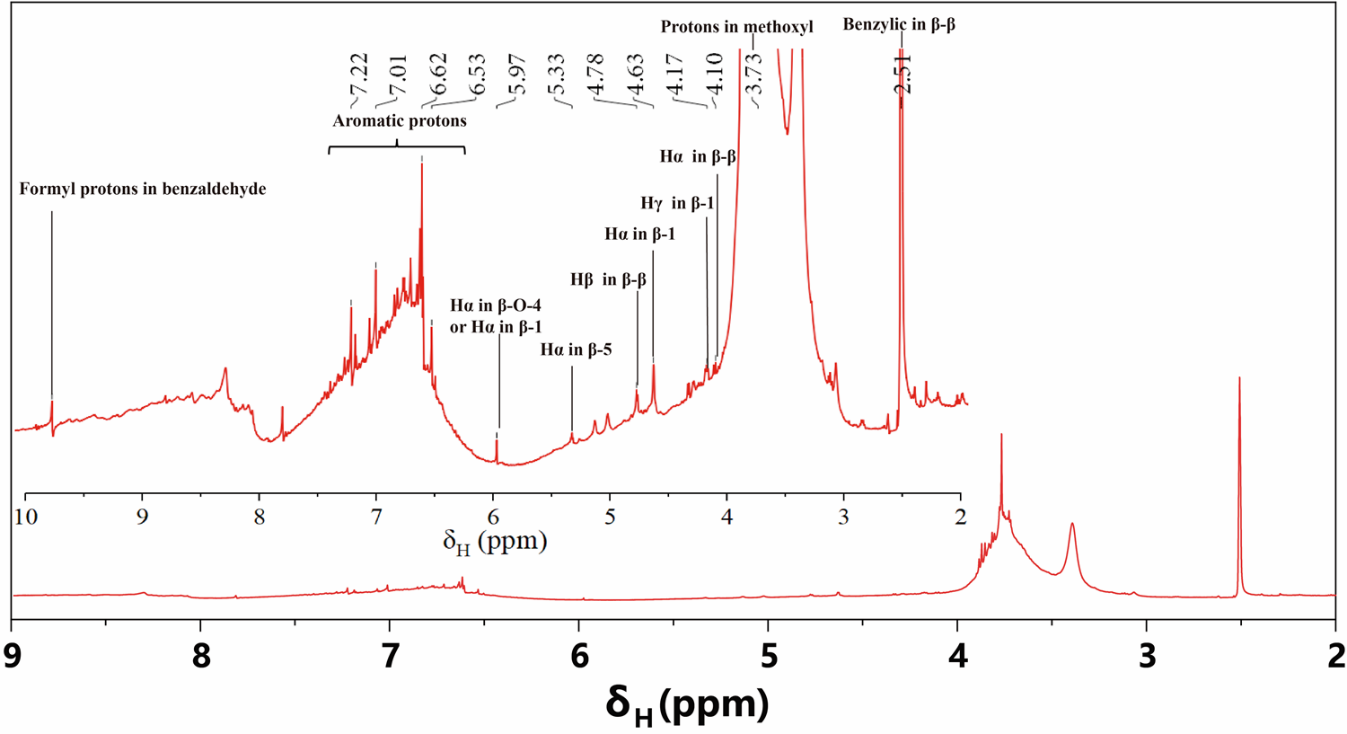
**

**Figure S1.** Quantitative 1H NMR spectrum of lignin.


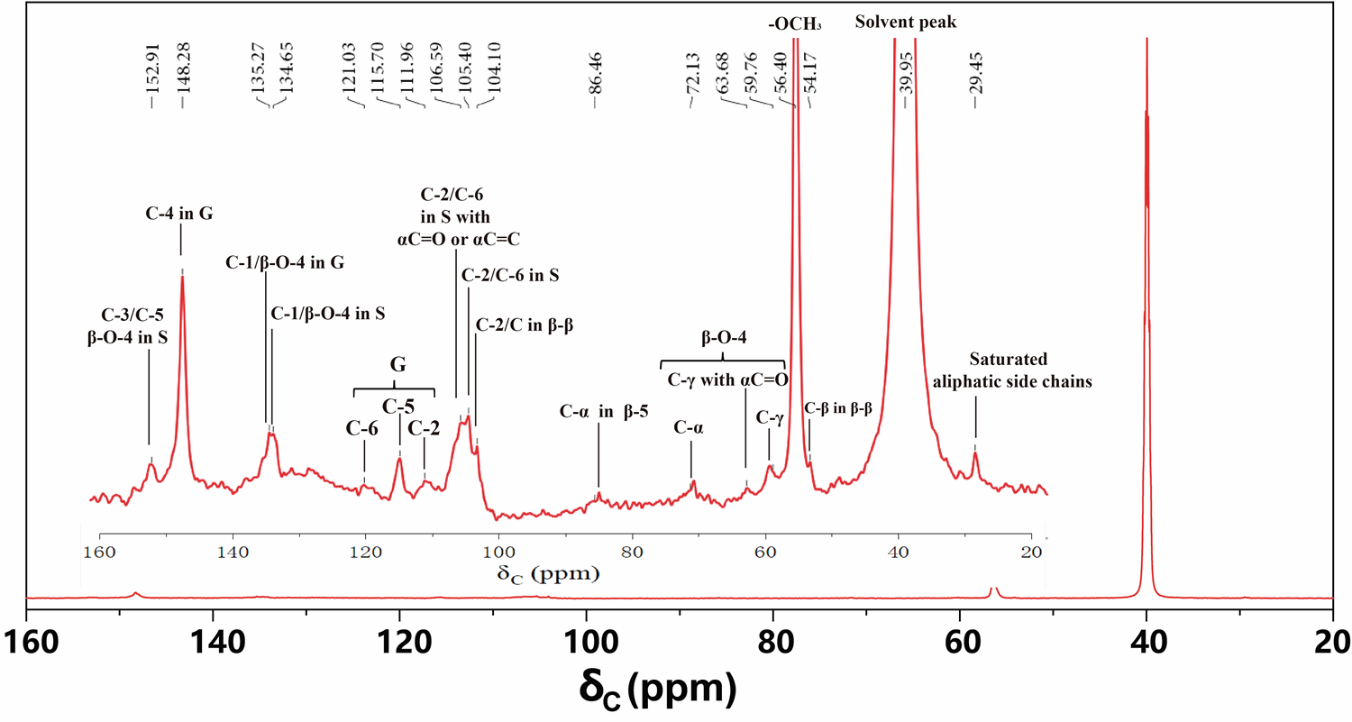


**Figure S2.** Quantitative 13C NMR spectrum of lignin.


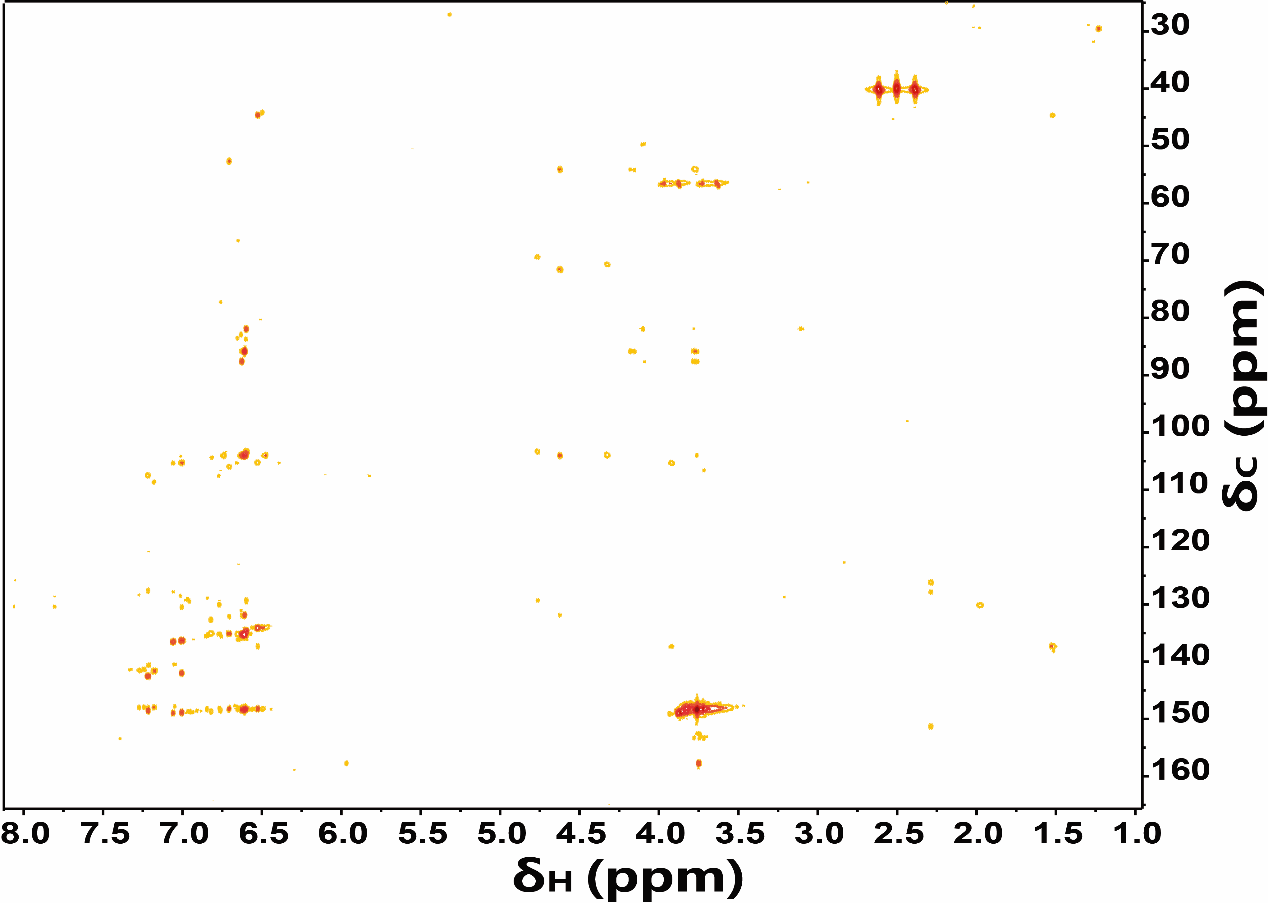


**Figure S3.** HMBC spectra (600 MHz with a cryogenic probe, DMSO-d6) of lignin.


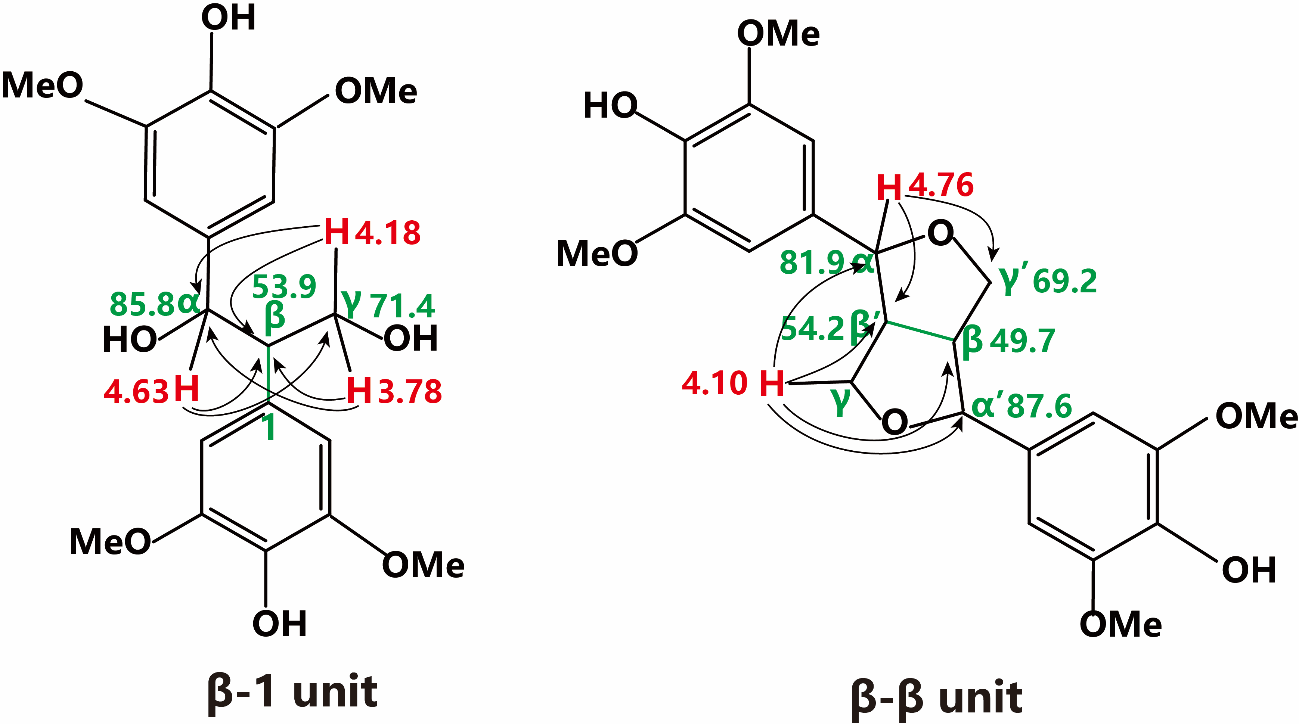


**Figure S4.** Main linkages of lignin obtained from HMBC spectra.


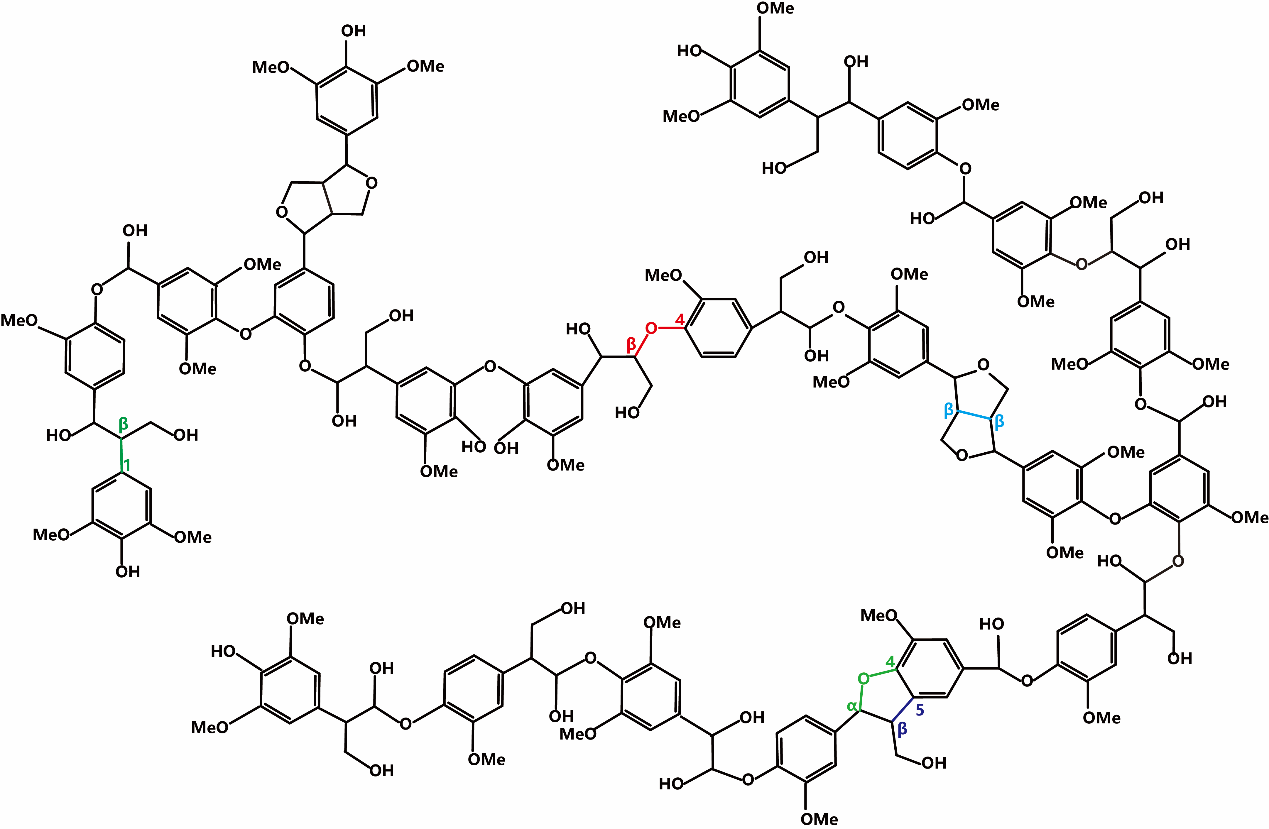


**Figure S5.** Molecular structure of lignin deduced from the results of NMR.


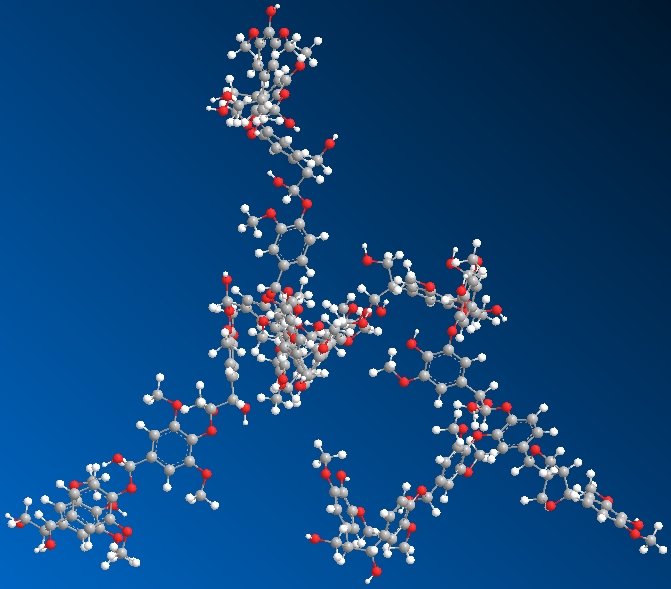


**Figure S6.** Three dimensional structure of lignin molecule simulated by ChemDraw software.





**Figure S7.** Thermogravimetric (TG) analysis of lignin in a nitrogen atmosphere.


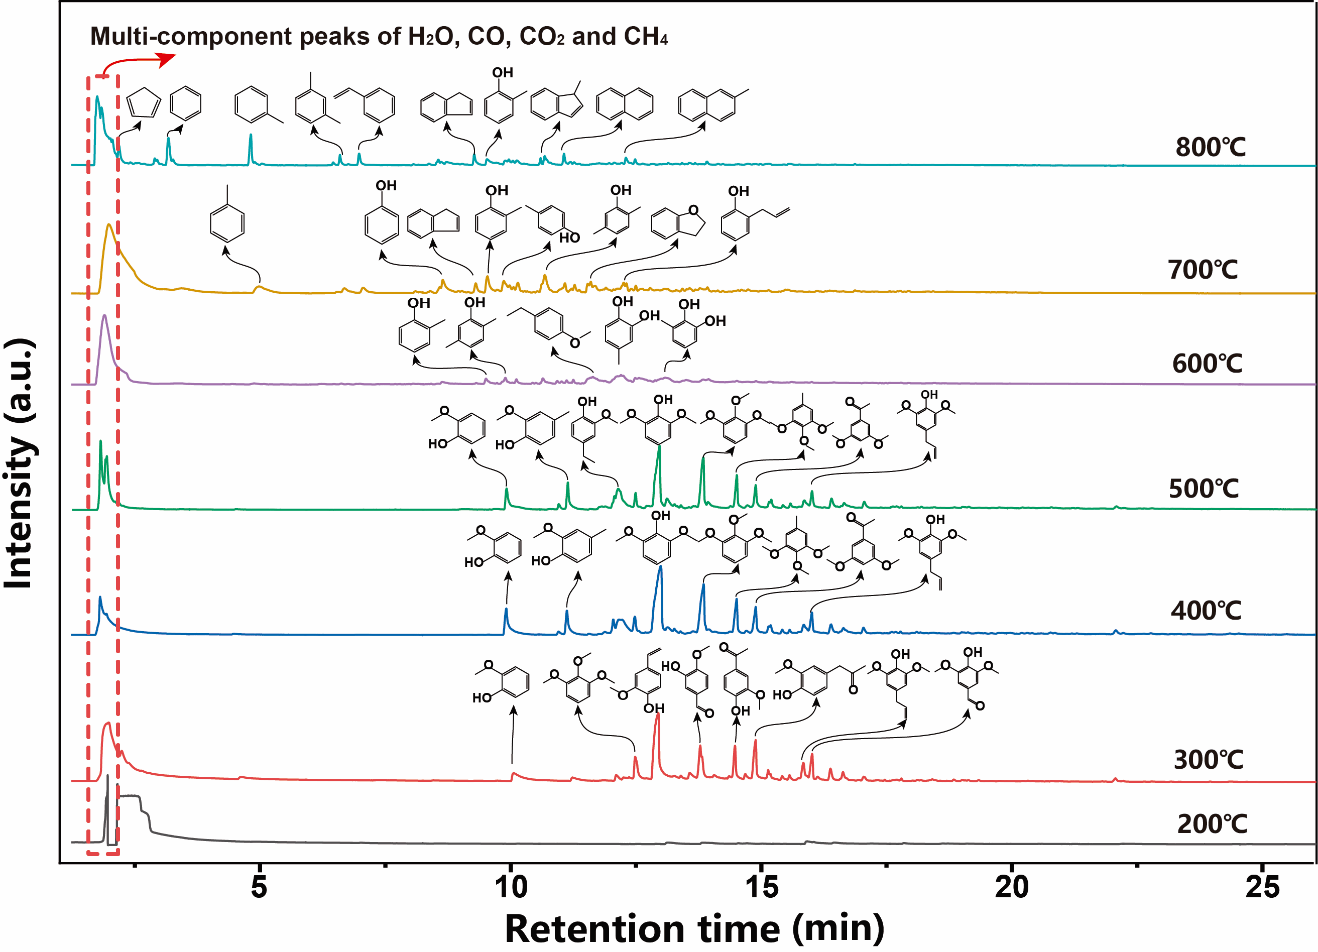


**Figure S8.** Pyrolysis products of lignin at different temperatures obtained by pyrolysis gas chromatography-mass spectrometry (PY-GCMS).


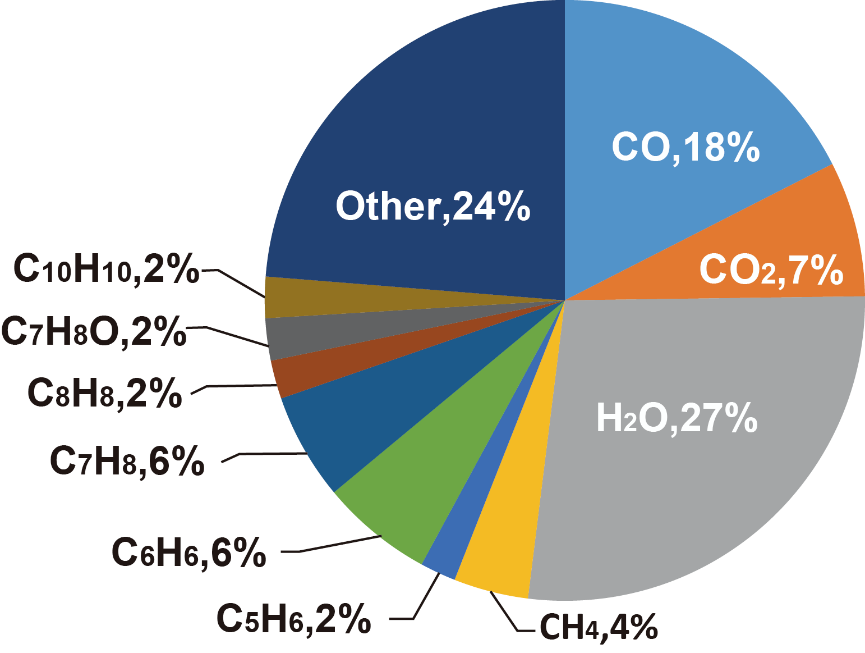


**Figure S9.** Main pyrolysis products of lignin at 800°C from PY-GCMS.


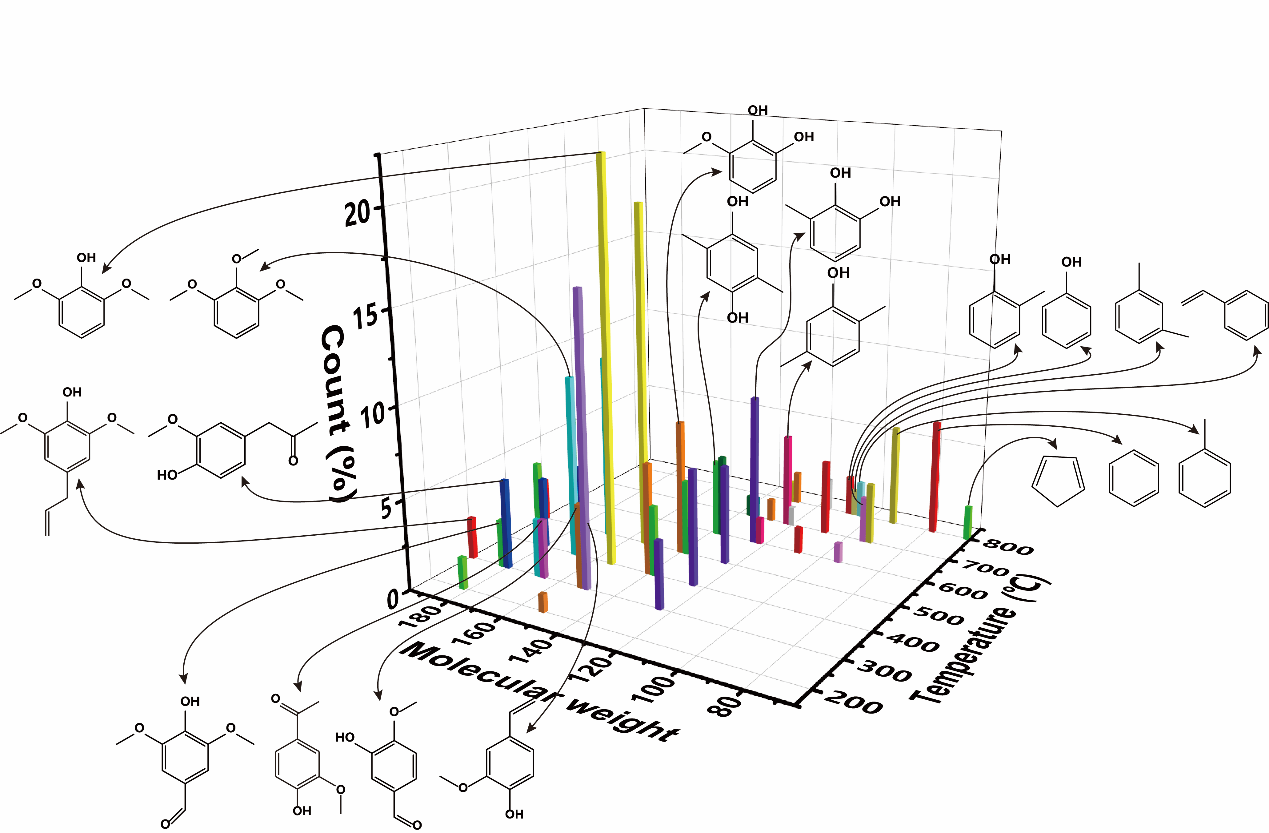


**Figure S10.** Main pyrolysis products (aromatic hydrocarbon) of lignin in the temperature range of 200-800°C from PY-GCMS analysis.


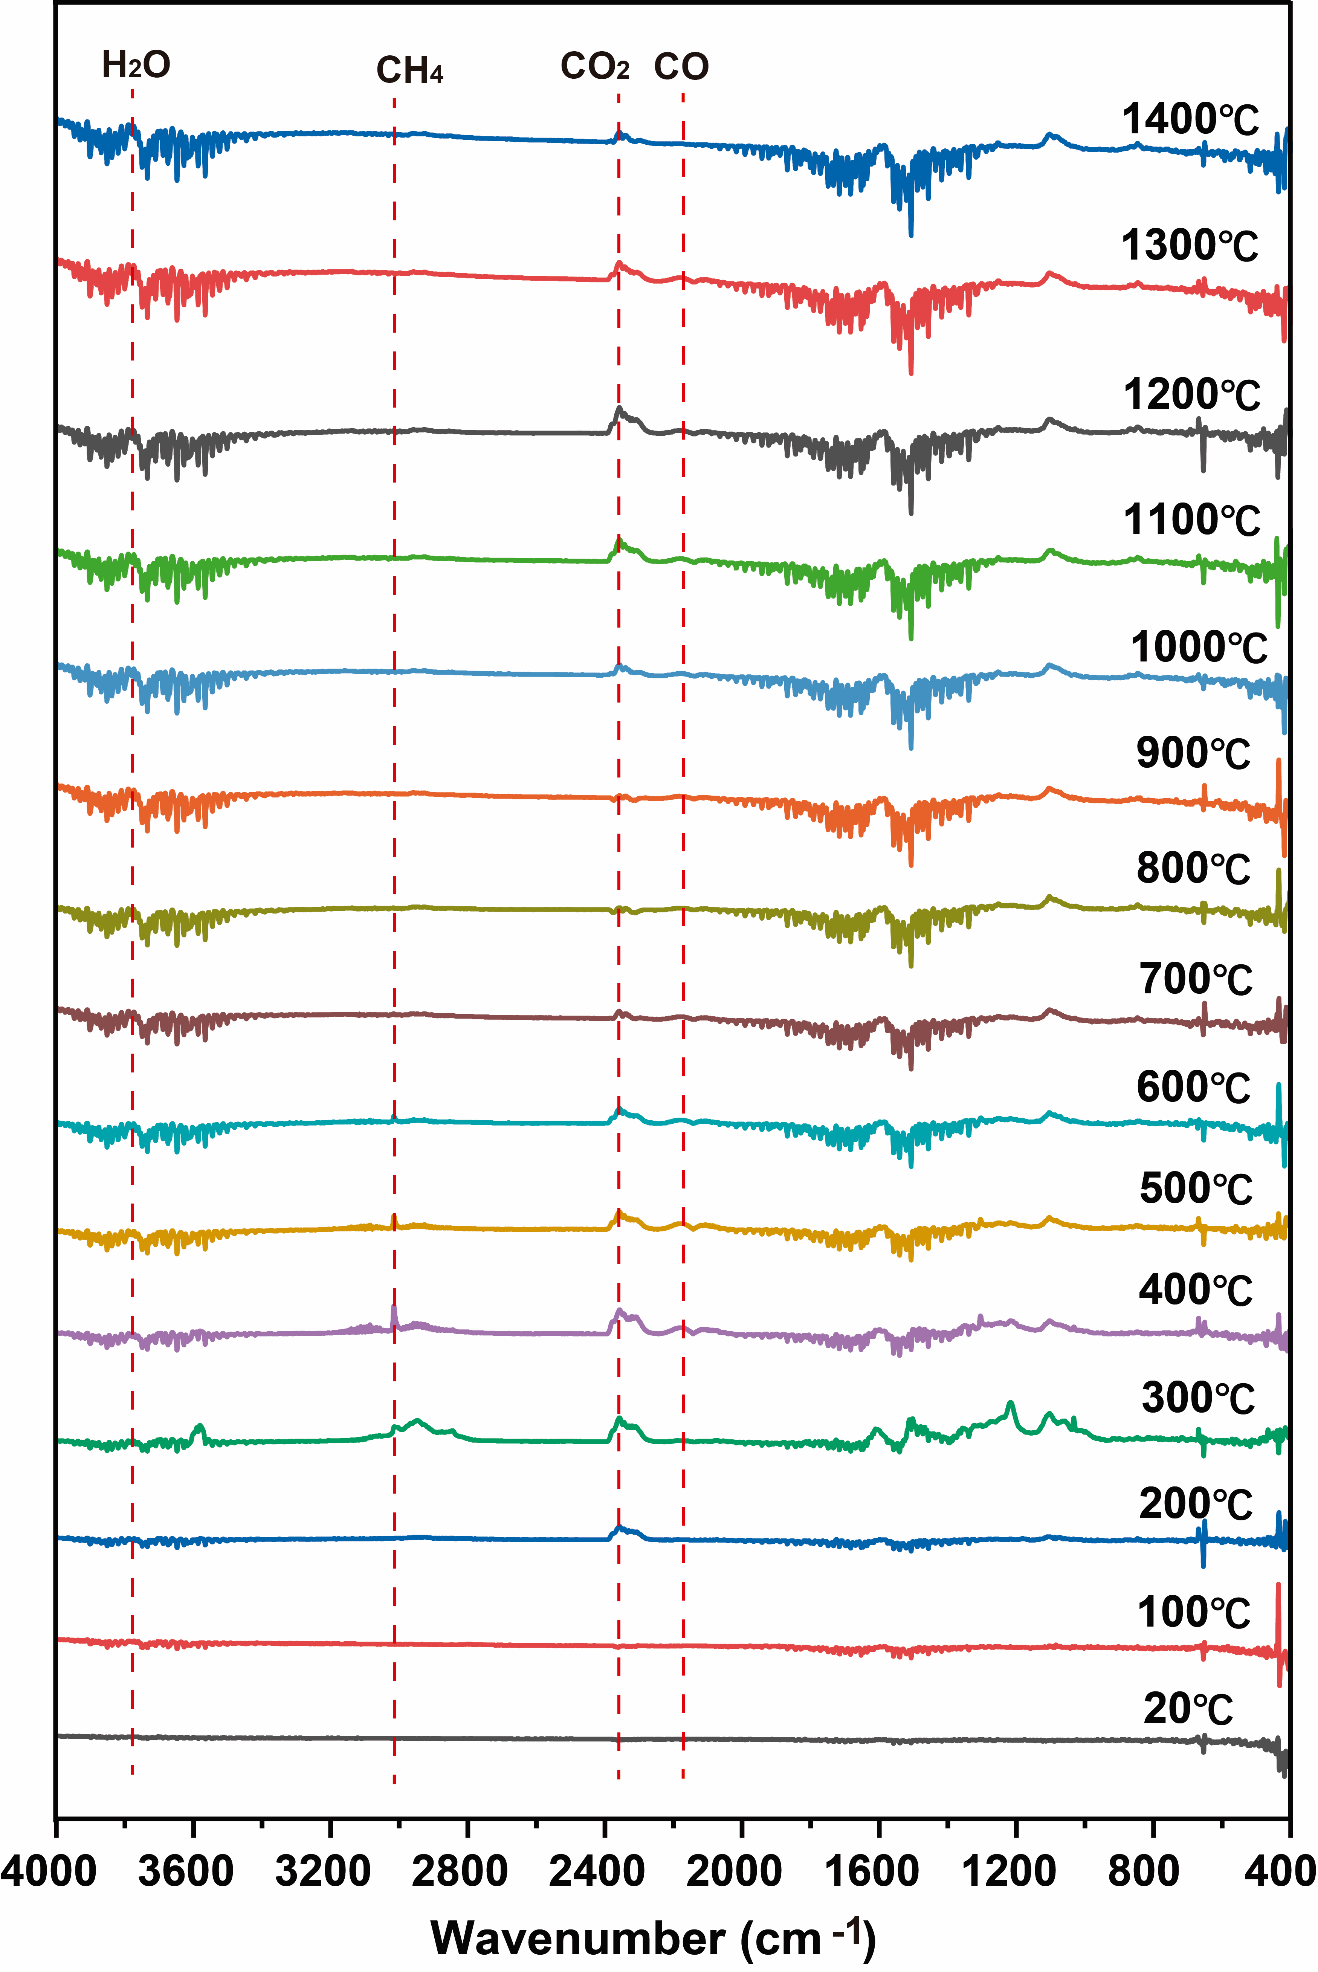


**Figure S11.** FTIR spectra of pyrolysis products of lignin at 20-1400°C.


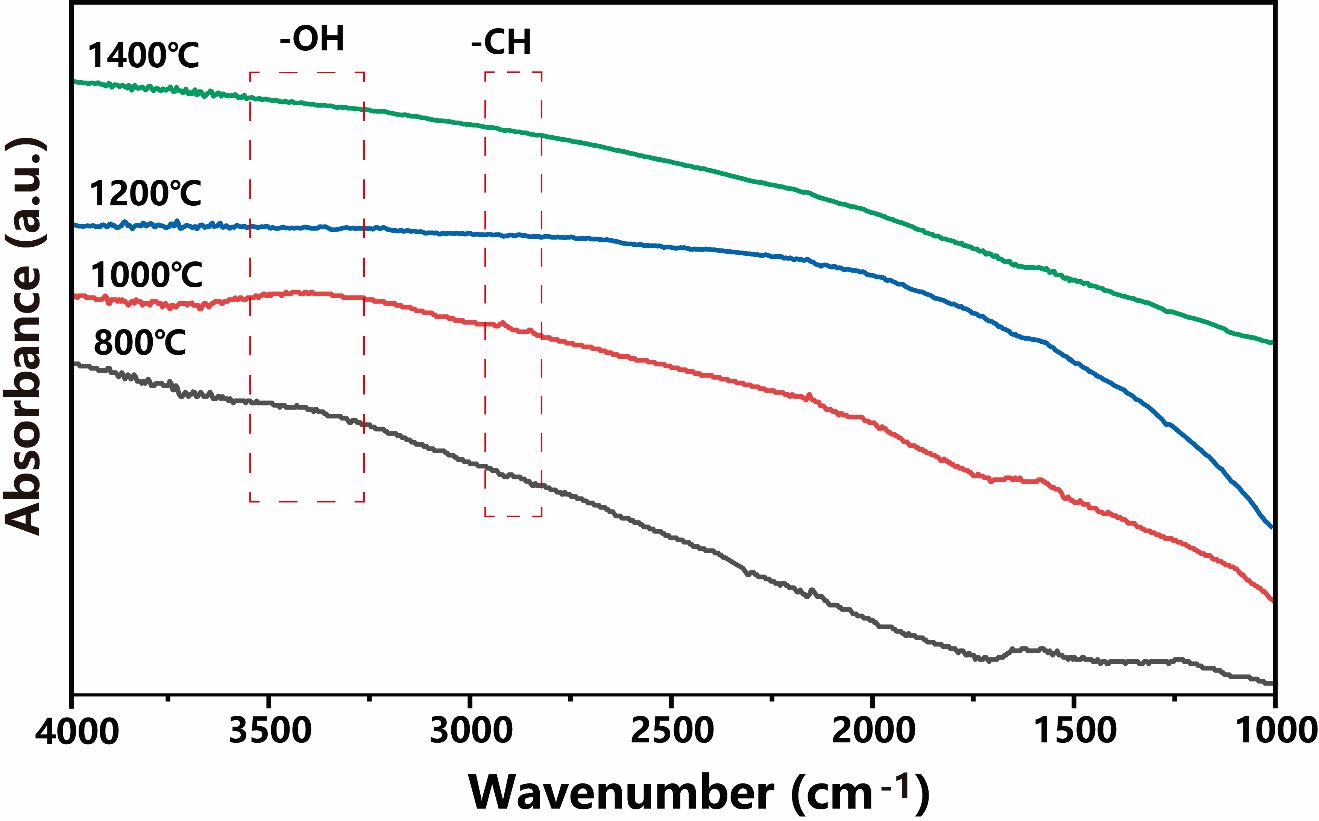


**Figure S12.** FTIR spectra of lignin charcoal at 800-1400°C.

**
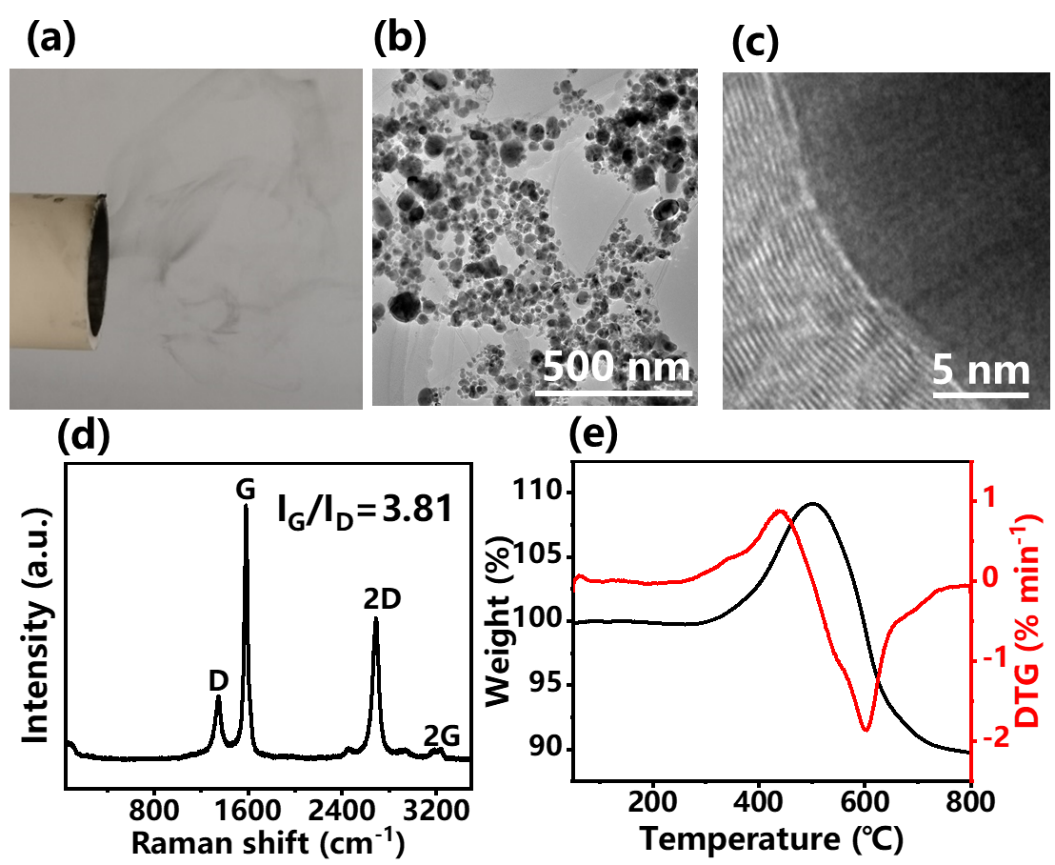
**

**Figure S13.** Carbon nanospheres synthesis without sulfur. (a) Digital image and (b, c) TEM images of the carbon nanospheres. (d) Raman spectrum and (e) TGA of the carbon nanospheres prepared without thiophene addition.


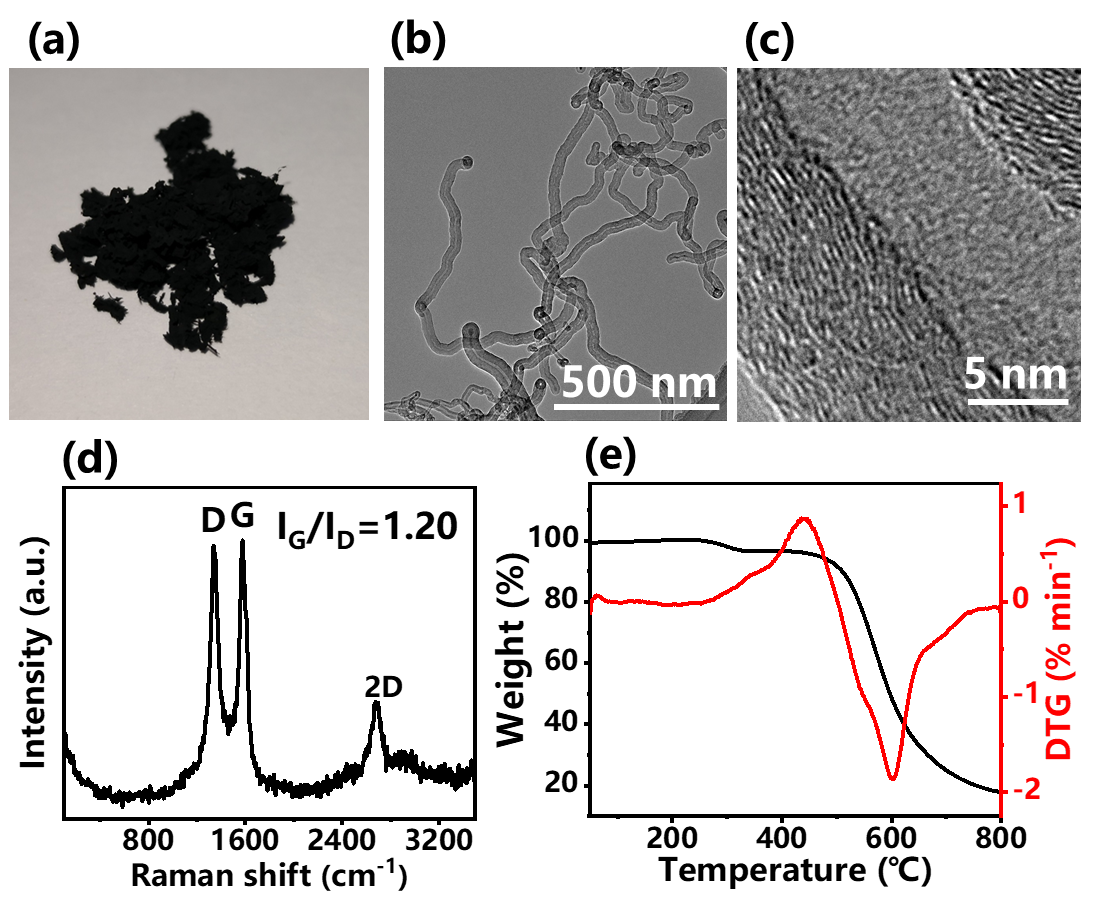


**Figure S14.** CNT synthesis with excessive sulfur. (a) Digital image and (b, c) TEM images of the curled CNTs. (d) Raman spectrum and (e) TGA of the CNTs prepared with excessive thiophene addition.


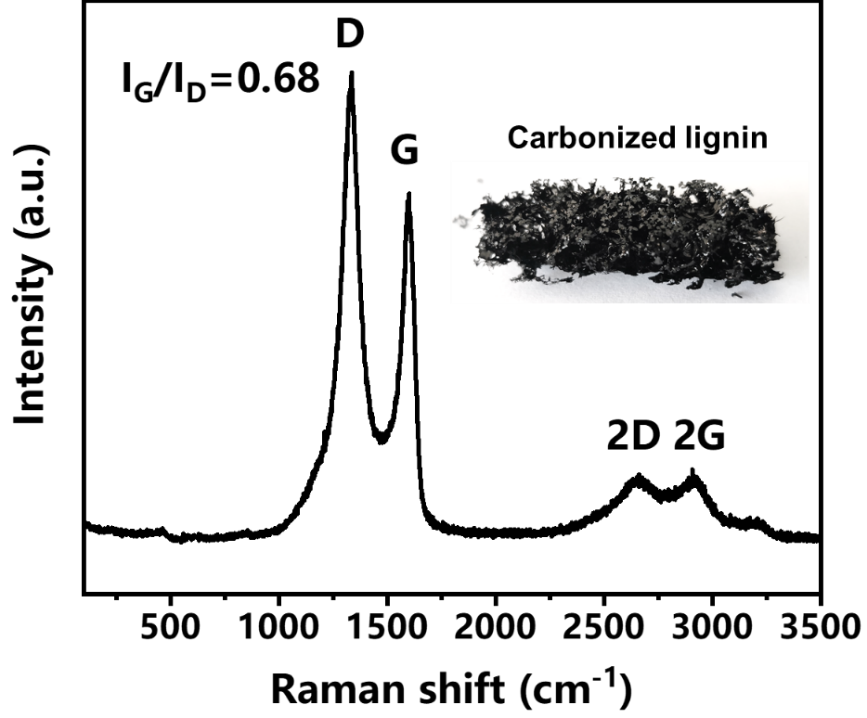


**Figure S15.** Raman spectrum of black charcoal from the pyrolysis of solid lignin at 1400°C for 30 min in N2 atmosphere.


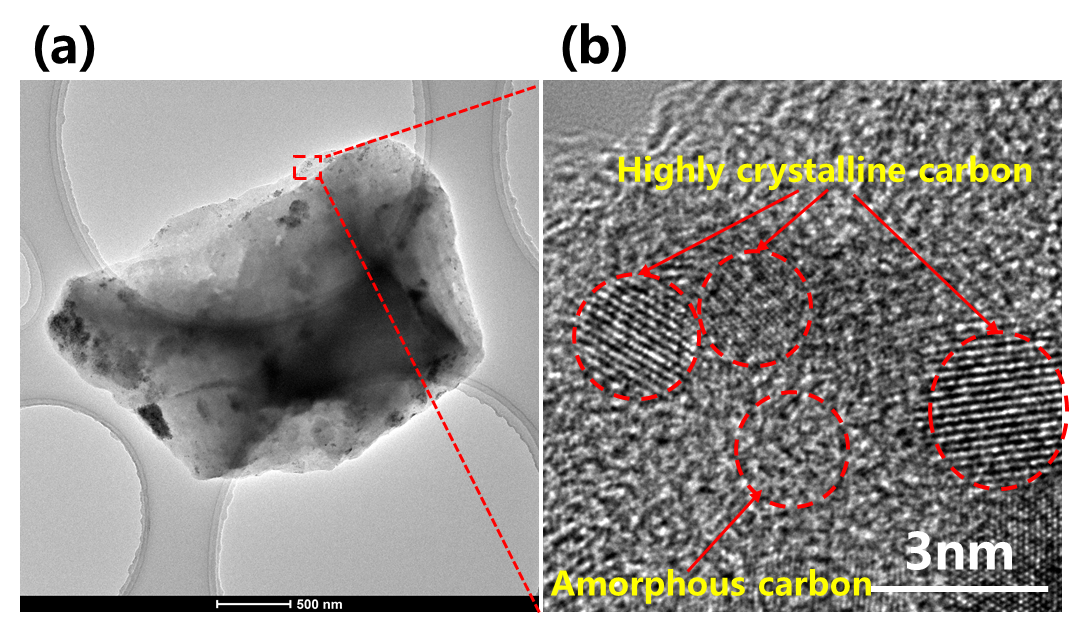


**Figure S16.** Morphologies of the lignin-drived black charcoal. (a) TEM image and (b) enlarged view of black charcoal from the pyrolysis of solid lignin at 1400°C for 30 min in N2 atmosphere.


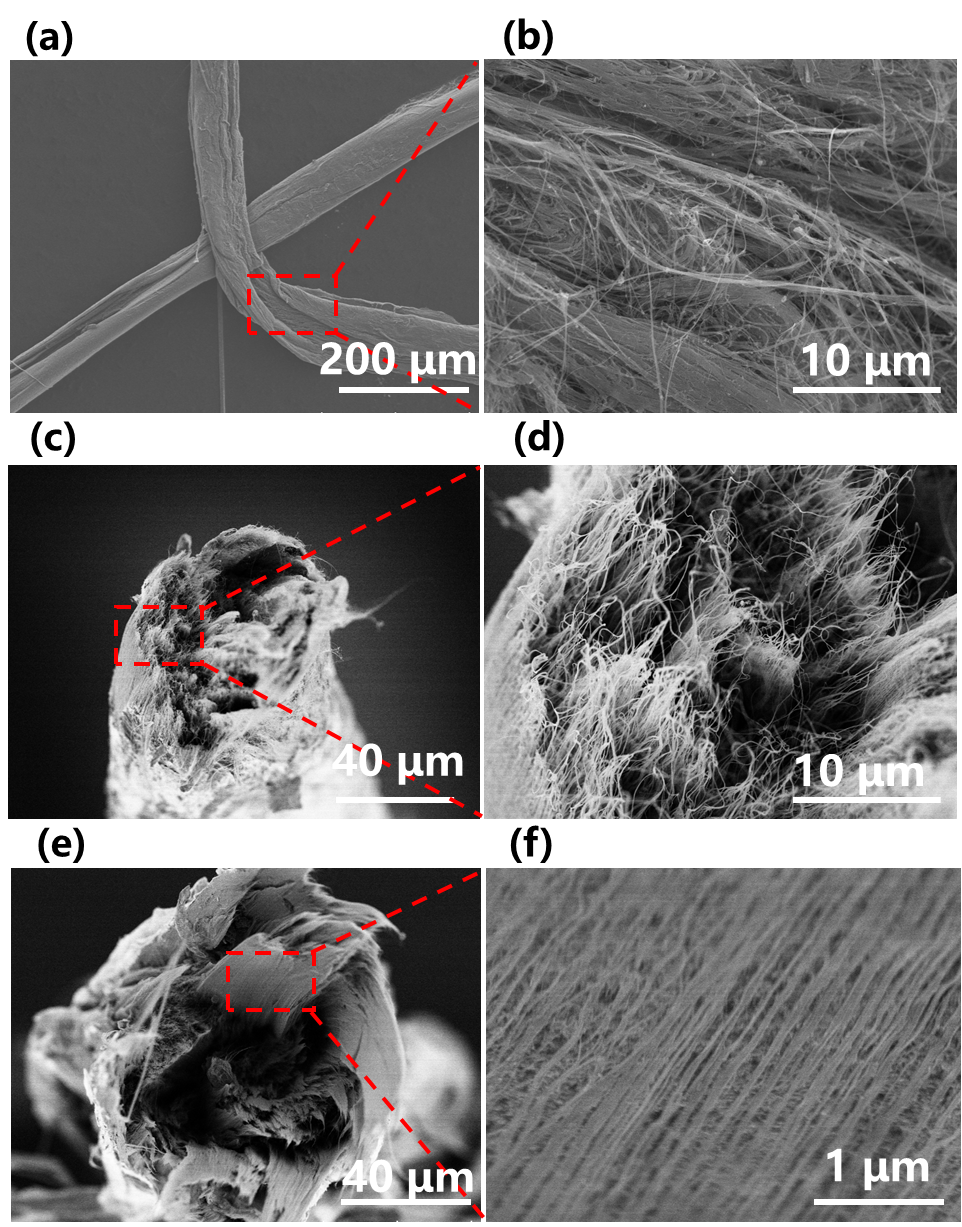


**Figure S17.** Morphologies of the nascent CNT fibers, twisted CNT fibers and rolled CNT fibers. (a) SEM image of the nascent CNT fibers and (b) magnified SEM image. (c) Cross-sectional SEM image of the twisted CNT fibers and (d) magnified SEM image. (e) Cross-sectional SEM image of the rolled CNT fibers and (d) magnified SEM image.


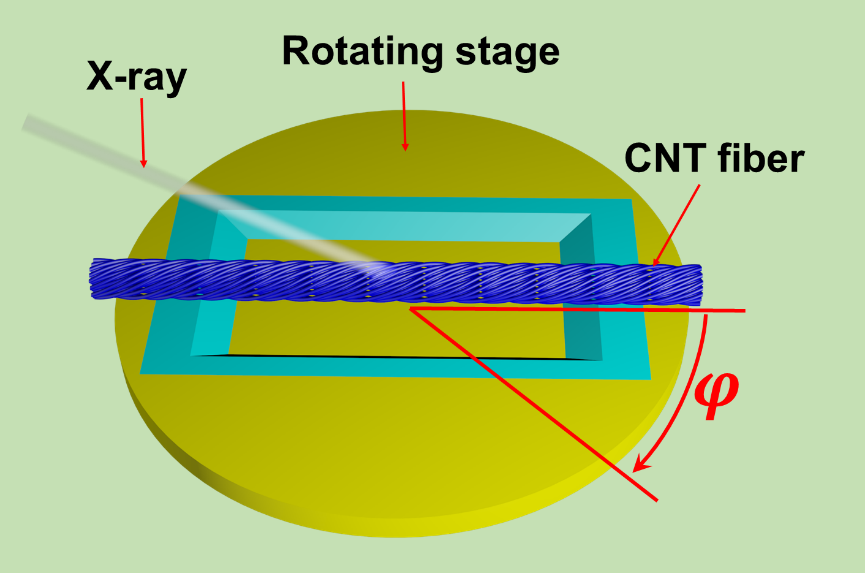


**Figure S18.** Schematic diagram for the determination of the fiber orientation by WAXD azimuthal scanning.


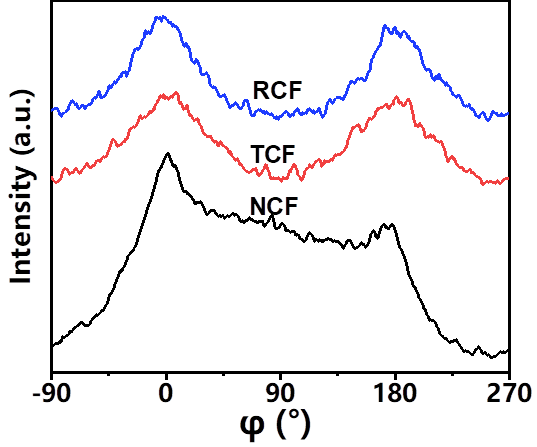


**Figure S19.** WAXD azimuthal scanning of the NCFs, TCFs and RCFs.


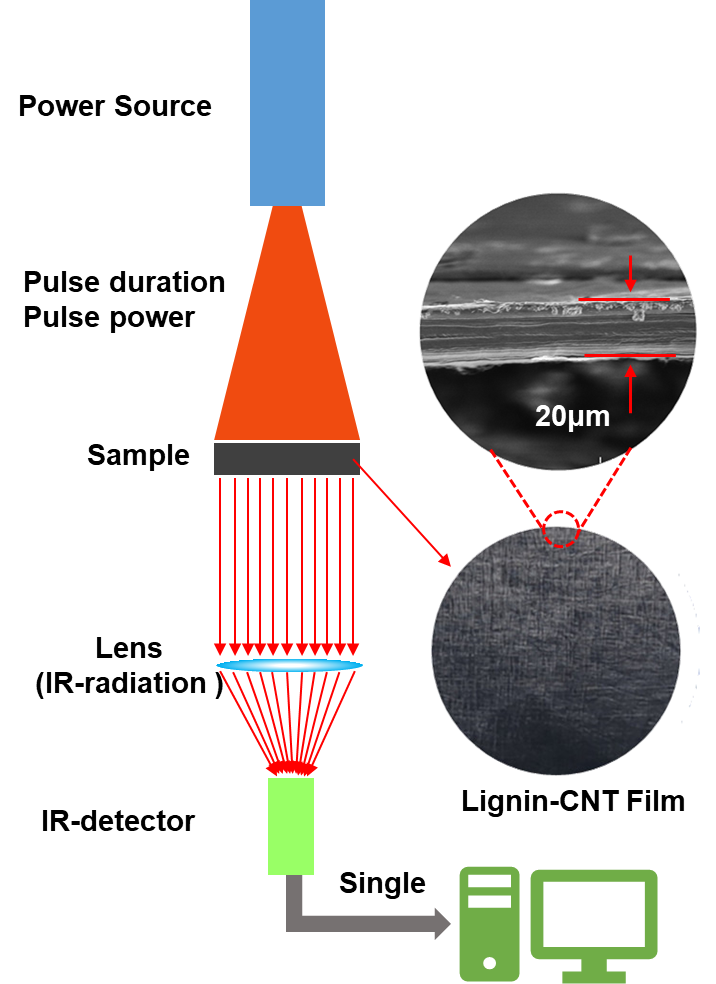


**Figure S20.** Schematic showing the thermal conductivity measurement of the CNT film.

Movie S1. Continuously processing waste lignin into high-value carbon nanotube fibers

## References

1. Ghosh P, Afre RA, Soga T, Jimbo T. A simple method of producing single-walled carbon nanotubes from a natural precursor: Eucalyptus oil. *Mater. Lett.* **61**, 3768-3770 (2007).

2. Ghosh P*, et al.* Vertically aligned carbon nanotubes from natural precursors by spray pyrolysis method and their field electron emission properties. *Appl. Phys. A-Mater.* **94**, 51-56 (2009).

3. Kumar R, Singh RK, Tiwari R. Growth analysis and high-yield synthesis of aligned-stacked branched nitrogen-doped carbon nanotubes using sesame oil as a natural botanical hydrocarbon precursor. *Mater. Design* **94**, 166-175 (2016).

4. Kang Z, Wang E, Mao B, Su Z, Chen L, Xu L. Obtaining carbon nanotubes from grass. *Nanotechnology* **16**, 1192 (2005).

5. Xie X*, et al.* A method for producing carbon nanotubes directly from plant materials. *Forest. Prod. J.* **59**, (2009).

6. Qu J, Cong Q, Luo C, Yuan X. Adsorption and photocatalytic degradation of bisphenol A by low-cost carbon nanotubes synthesized using fallen leaves of poplar. *RSC Adv.* **3**, 961-965 (2013).

7. Gindl-Altmutter W*, et al.* Lignin-based multiwall carbon nanotubes. *Composites, Part A* **121**, 175-179 (2019).

8. Hong W-T, Tai N-H. Investigations on the thermal conductivity of composites reinforced with carbon nanotubes. *Diam. Relat. Mater*. **17**, 1577-1581 (2008).

9. Kim HS, Jang J-u, Yu J, Kim SY. Thermal conductivity of polymer composites based on the length of multi-walled carbon nanotubes. *Composites, Part B* **79**, 505-512 (2015).

10. Yan Q, Arango R, Li J, Cai Z. Fabrication and characterization of carbon foams using 100% Kraft lignin. *Mater. Design* **201**, 109460 (2021).

11. Liu J*, et al.* Thermal conductivity and annealing effect on structure of lignin-based microscale carbon fibers. *Carbon* **121**, 35-47 (2017).

12. Wang R*, et al.* Anisotropic thermal conductivities and structure in lignin-based microscale carbon fibers. *Carbon* **147**, 58-69 (2019).

13. Grishechko LI, Amaral-Labat Gi, Szczurek A, Fierro V, Kuznetsov BN, Celzard A. Lignin–phenol–formaldehyde aerogels and cryogels. *Micropor. Mesopor. Mat*. **168**, 19-29 (2013).

14. The Online Materials Information Resource. *The Online Materials Information Resource* (http://www.matweb.com/).

15. Wang L*, et al.* Conductive Carbon Microfibers Derived from Wet-Spun Lignin/Nanocellulose Hydrogels. *ACS Sustain. Chem. Eng*. **7**, 6013-6022 (2019).

16. Nowak AP*, et al.* Lignin-based carbon fibers for renewable and multifunctional lithium-ion battery electrodes. *Holzforschung* **72**, 81-90 (2018).

17. Li Q*, et al.* Microstructure defines the electroconductive and mechanical performance of plant-derived renewable carbon fiber. *Chem. Commun*. **55**, 12655-12658 (2019).

18. Prauchner MJ, Pasa VMD, Otani S, Otani C. Biopitch-based general purpose carbon fibers: Processing and properties. *Carbon* **43**, 591-597 (2005).

19. Kinumoto T, Matsumura T, Yamaguchi K, Matsuoka M, Tsumura T, Toyoda M. Material Processing of Bamboo for Use as a Gas Diffusion Layer in Proton Exchange Membrane Fuel Cells. *ACS Sustain. Chem. Eng*. **3**, 1374-1380 (2015).

20. Wang JF*, et al.* Wet-spinning of highly conductive nanocellulose-silver fibers. *J Mater. Chem C*. **5**, 9673-9679 (2017).

21. Torres-Canas F*, et al.* Improved structure and highly conductive lignin-carbon fibers through graphene oxide liquid crystal. *Carbon* **163**, 120-127 (2020).

22. Wang Q, Wang C, Zhang M, Jian M, Zhang Y. Feeding Single-Walled Carbon Nanotubes or Graphene to Silkworms for Reinforced Silk Fibers. *Nano Lett.* **16**, 6695-6700 (2016).
